# Supplementary material
Source: PubMed Central journal article supplement (PMC3457515)
Supplement: AEM.01507-12_zam999103698so1.pdf [file AEM.01507-12_zam999103698so1.pdf]

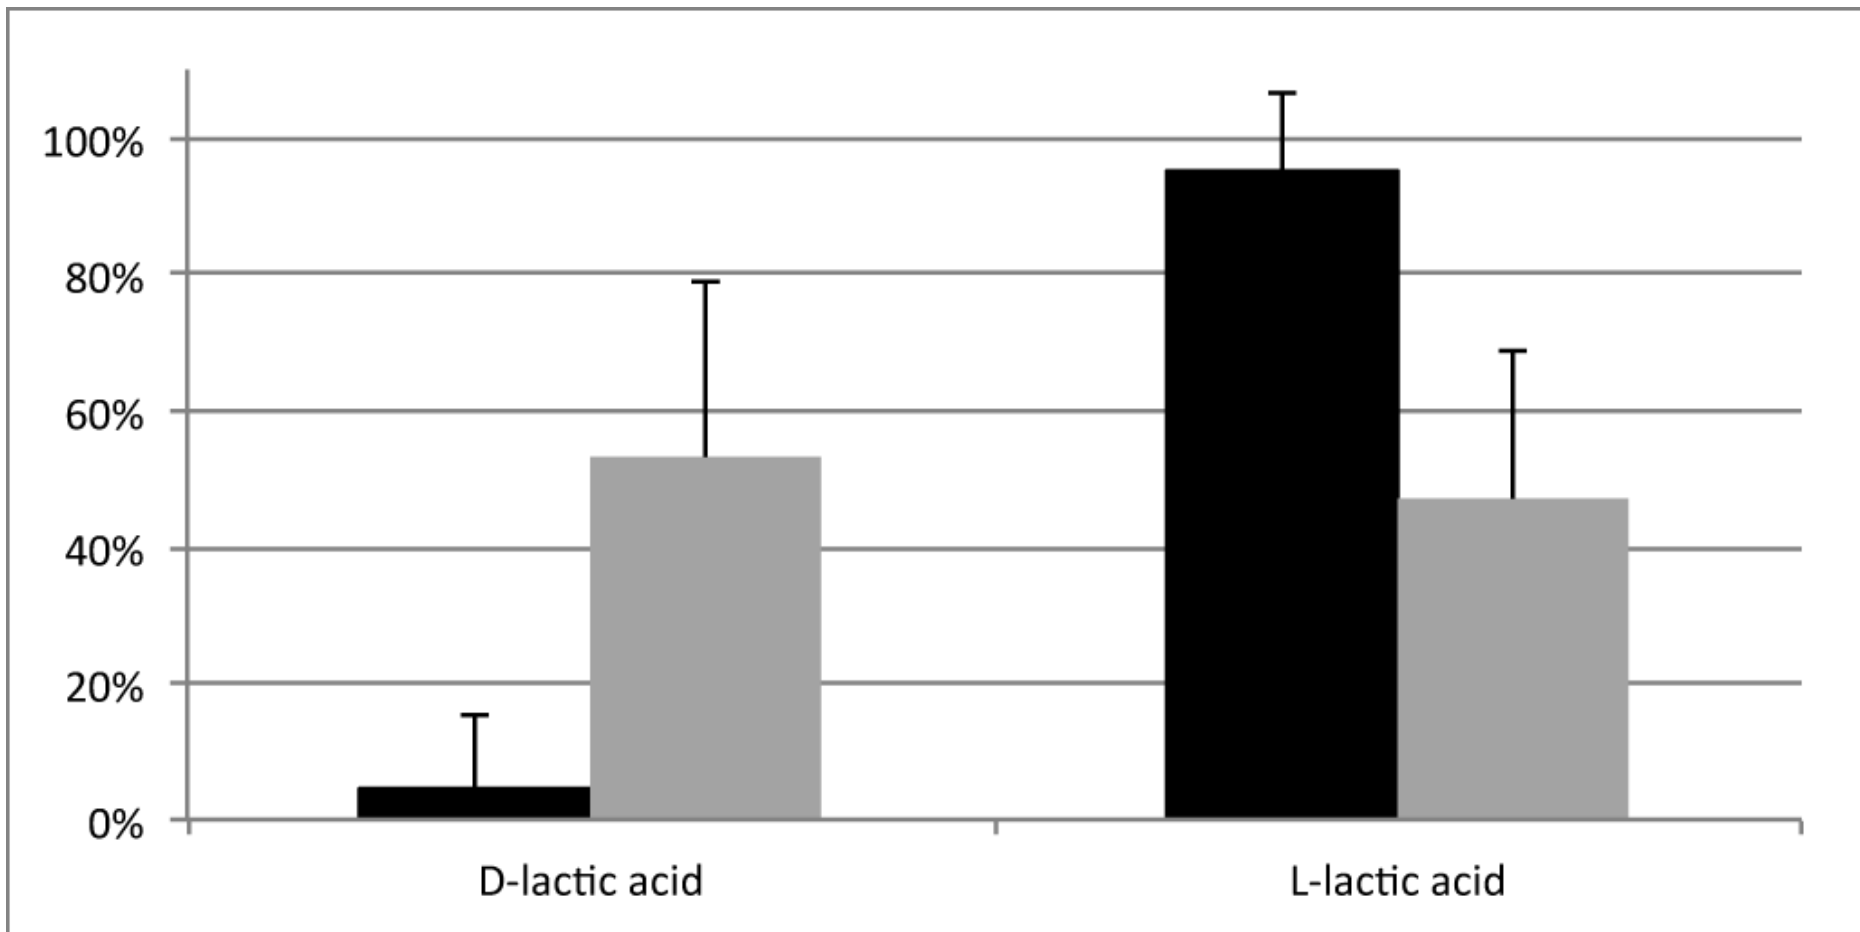

**Supplementary Figure S1.** Relative formation of D- and L-lactic acid *in vivo* (black bars) and *in vitro* upon assaying LDH activity (white bars).
